# Supplementary material for: New Developments of the Principle of Vinylogy as Applied to π-Extended Enolate-Type Donor Systems
Source: PubMed Central journal article supplement (PMC7993750; doi:10.1021/acs.chemrev.9b00481), 2020-02-10

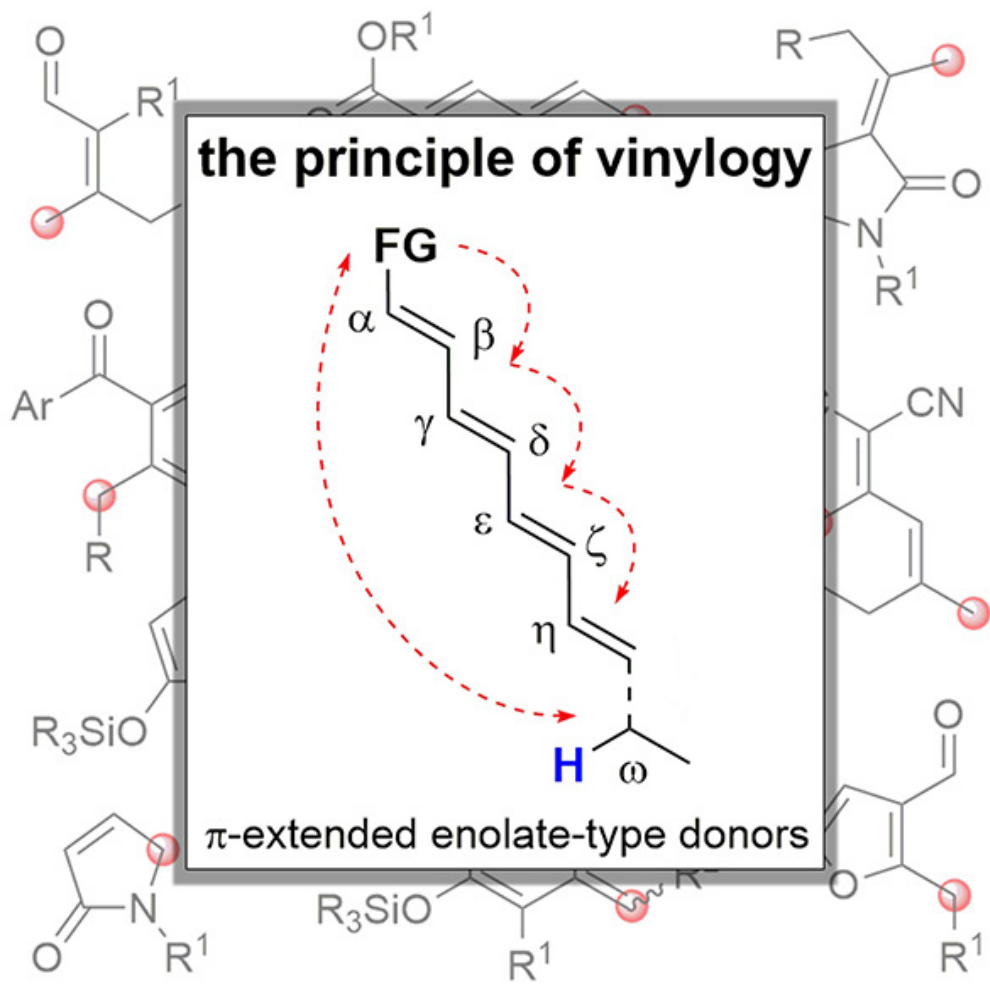

Supplement: cr9b00481_si_001.pdf [file cr9b00481_si_001.pdf]
